# Supplementary material for: Waterpipe tobacco smoking legislation and policy enactment: a global analysis
Source: PubMed Central journal article supplement — Tob Control. 2014 Dec 30;24(Suppl 1):i60–5. doi: 10.1136/tobaccocontrol-2014-051911 (PMC4345984; doi:10.1136/tobaccocontrol-2014-051911), 2014-12-30
Supplement: tobaccocontrol-2014-051911-s1.pdf [file tobaccocontrol-2014-051911-s1.pdf]

Appendix 1 (online supplementary material): List of 62 countries included in analysis

| <b>Americas Region</b>              |              |           |            |           |                  |          |
|-------------------------------------|--------------|-----------|------------|-----------|------------------|----------|
| Argentina                           | Brazil       | Canada    | Chile      | Colombia  | Costa Rica       | Ecuador  |
| Guatemala                           | Honduras     | Jamaica   | Mexico     | Panama    | Peru             | Uruguay  |
| <b>Eastern Mediterranean Region</b> |              |           |            |           |                  |          |
| Egypt                               | Jordan       | Lebanon   | Pakistan   |           |                  |          |
| <b>Europe</b>                       |              |           |            |           |                  |          |
| England                             | France       | Iceland   | Ireland    | Israel    | Northern Ireland | Norway   |
| Poland                              | Russia       | Scotland  | Spain      | Sweden    | Turkey           | Ukraine  |
| Wales                               |              |           |            |           |                  |          |
| <b>Africa</b>                       |              |           |            |           |                  |          |
| Burkino Faso                        | Chad         | Kenya     | Madagascar | Mauritius | Namibia          | Niger    |
| Seychelles                          | South Africa | Tanzania  | Togo       |           |                  |          |
| <b>South East Asia</b>              |              |           |            |           |                  |          |
| Bangladesh                          | Bhutan       | India     | Indonesia  | Nepal     | Sri Lanka        | Thailand |
| <b>Western Pacific</b>              |              |           |            |           |                  |          |
| Australia                           | Brunei       | China     | Hong Kong  | Japan     | Macau            | Malaysia |
| New Zealand                         | Philippines  | Singapore | Taiwan     | Vietnam   |                  |          |

Appendix 2 (online supplementary material): List of countries with cigarette-specific laws, where waterpipe tobacco could be exempt

| <b>Smokefree law (n=0)</b> | <b>Misleading descriptors (n=6)</b> | <b>Health warnings (n=14)</b> | <b>Advertising, sponsorship, promotion (n=2)</b> |
|----------------------------|-------------------------------------|-------------------------------|--------------------------------------------------|
| -                          | Australia                           | Australia                     | Hong Kong                                        |
|                            | Brazil                              | Canada                        | Japan                                            |
|                            | Chile                               | Hong Kong                     |                                                  |
|                            | China                               | Jamaica                       |                                                  |
|                            | Japan                               | Japan                         |                                                  |
|                            | Jordan                              | Jordan                        |                                                  |
|                            |                                     | Macau                         |                                                  |
|                            |                                     | Madagascar                    |                                                  |
|                            |                                     | Malaysia                      |                                                  |
|                            |                                     | Niger                         |                                                  |
|                            |                                     | Pakistan                      |                                                  |
|                            |                                     | Poland                        |                                                  |
|                            |                                     | Taiwan                        |                                                  |
|                            |                                     | Thailand                      |                                                  |

Appendix 3 (Online supplementary material) –Count of news articles by themes and subthemes and by Country

| <b>Country Source of Article</b>                              |                    |                    |                       |                     |                          |                        |
|---------------------------------------------------------------|--------------------|--------------------|-----------------------|---------------------|--------------------------|------------------------|
| <b>Legislation (264)</b>                                      |                    |                    |                       |                     |                          |                        |
|                                                               | <b>US<br/>(81)</b> | <b>UK<br/>(54)</b> | <b>India<br/>(26)</b> | <b>UAE<br/>(22)</b> | <b>Pakistan<br/>(14)</b> | <b>Others<br/>(67)</b> |
| <b>Smoking Ban (Indoor, Public Places, &amp; General Ban)</b> | 42                 | 14                 | 8                     | 9                   | 10                       | 44                     |
| <b>SB Violation</b>                                           | 10                 | 28                 | 8                     | 3                   | 2                        | 3                      |
| <b>Zoning</b>                                                 | 15                 | 1                  | 0                     | 11                  | 1                        | 13                     |
| <b>Taxation/Price</b>                                         | 0                  | 0                  | 0                     | 0                   | 0                        | 1                      |
| <b>HW Labels</b>                                              | 2                  | 2                  | 0                     | 0                   | 0                        | 4                      |
| <b>Licensing</b>                                              | 23                 | 21                 | 8                     | 5                   | 1                        | 16                     |
| <b>Ban of Sales/Import/Advertising</b>                        | 4                  | 1                  | 3                     | 1                   | 1                        | 4                      |
| <b>Underage WP Smoking</b>                                    | 10                 | 1                  | 6                     | 3                   | 2                        | 13                     |
| <b>General discussion of Regulation</b>                       | 8                  | 1                  | 1                     | 8                   | 0                        | 4                      |
| <b>Health (150)</b>                                           |                    |                    |                       |                     |                          |                        |
|                                                               | <b>US<br/>(80)</b> | <b>UK<br/>(7)</b>  | <b>India<br/>(4)</b>  | <b>UAE<br/>(5)</b>  | <b>Pakistan<br/>(7)</b>  | <b>Others<br/>(47)</b> |
| <b>Negative Effects of WP</b>                                 | 77                 | 6                  | 3                     | 4                   | 7                        | 46                     |
| <b>Claims denying Health Effects</b>                          | 1                  | 0                  | 0                     | 1                   | 0                        | 0                      |
| <b>Controversy</b>                                            | 2                  | 1                  | 1                     | 0                   | 0                        | 1                      |
| <b>Promotion (113)</b>                                        |                    |                    |                       |                     |                          |                        |
|                                                               | <b>US<br/>(71)</b> | <b>UK<br/>(12)</b> | <b>India<br/>(4)</b>  | <b>UAE<br/>(5)</b>  | <b>Pakistan<br/>(2)</b>  | <b>Others<br/>(19)</b> |
| <b>Price</b>                                                  | 21                 | 4                  | 0                     | 1                   | 1                        | 6                      |
| <b>Flavors</b>                                                | 27                 | 6                  | 1                     | 2                   | 0                        | 3                      |
| <b>Celebrities</b>                                            | 3                  | 3                  | 2                     | 1                   | 0                        | 2                      |
| <b>Café/Lounge</b>                                            | 33                 | 0                  | 0                     | 1                   | 0                        | 4                      |
| <b>Other</b>                                                  | 3                  | 3                  | 1                     | 1                   | 1                        | 5                      |

\*Total number of articles: 527

\*Subtheme numbers will not add up to the total for each country since most articles received more than one subtheme
